# Supplementary material for: Primary graphitization of multi-functional dihydropyridine, a novel method for reconstructing a TiO2 surface to obtain high photocatalytic activity for hydrogen peroxide synthesis
Source: Royal Society of Chemistry journal article supplement (doi:10.1039/d2se01628a), 2023-01-01
Supplement: d2se01628a1.pdf [file d2se01628a1.pdf]

**Primary graphitization of multi-functional dihydropyridine,  
a novel way to reconstruct TiO<sub>2</sub> surface to obtain high  
photocatalytic activity for hydrogen peroxide synthesis**

Suyan Li,<sup>a</sup> Xiaoyu Hu,<sup>a</sup> Yubo Li,<sup>a</sup> Yu Chen,<sup>a,b</sup> Manman Mu,<sup>a</sup> Lijun  
Zhang<sup>a,b,\*</sup>

<sup>a</sup> School of Chemistry and Chemical Engineering, Tianjin University of Technology,  
Tianjin 300384, PR China

<sup>b</sup> Tianjin Key Laboratory of Organic Solar Cells and Photochemical Conversion,  
Tianjin University of Technology, Tianjin 300384, PR China

\*Corresponding author at: 391 Binshui West Road, Xiqing District, Tianjin, 300384,  
PR China. Tel.: +86 02260214258; fax: +86 02260214252. E-mail addresses:

cdlijun2002@tjut.edu.cn.

# Index

|                                                                                        |    |
|----------------------------------------------------------------------------------------|----|
| 1 Characterization .....                                                               | 1  |
| 1.1 Detailed process for photoelectrochemical characterizations .....                  | 1  |
| 1.2 Detailed process for electrochemical tests using RDE .....                         | 2  |
| 2 Detailed experimental process .....                                                  | 4  |
| 2.1 Preparation of dihydropyridine ACMD and its structural characterization data ..... | 4  |
| 2.2 Determination of quantum efficiency and solar energy efficiency .....              | 5  |
| 2.2.1 Apparent quantum efficiency analysis .....                                       | 5  |
| 2.2.2 Determination of solar-to-chemical conversion efficiency .....                   | 6  |
| 2.3 H <sub>2</sub> O <sub>2</sub> degradation study .....                              | 7  |
| 2.4 Effect of benzyl alcohol on the reaction .....                                     | 8  |
| 3. Statement about Tauc efficiency .....                                               | 18 |
| References .....                                                                       | 18 |

# 1 Characterization

## 1.1 Detailed process for photoelectrochemical characterizations

Photoelectrochemical characterizations were conducted on a conventional three-electrode potentiostat setup connected to an electrochemical analyzer (Model 660E, CH Instruments). The Fluorine tin oxide conductive glass (FTO) glass of  $1 \times 2$  cm in size was covered with photocatalyst that was achieved by first mixing a catalyst (3-5 mg) in naphthol solution (20  $\mu$ L) and chitosan solution (3 mL) under the action of 40 kHz ultrasonic wave for 1 h and then covering on FTO by spin coater, followed by drying at room temperature and further drying at 40 °C overnight in a vacuum oven. The area of the photoelectrode was controlled to be 1 cm<sup>2</sup>.

The photoelectrochemical system consisted of an FTO glass covered by the photocatalyst, a coiled Pt wire, and a saturated Ag/AgCl/KCl (saturated) electrode as the working, counter, and reference electrode, respectively. The photocurrent was collected at 0.9 V versus NHE (0.6 V versus Ag/AgCl) in a Na<sub>2</sub>SO<sub>4</sub> solution (0.5M, pH 6.9). Electrochemical impedance spectroscopy analysis was performed at a D.C. voltage of -0.5 V versus Ag/AgCl with an A.C. voltage amplitude of 5 mV in a frequency range from 100 kHz to 0.1 Hz. For the Mott-Schottky measurements, a similar strategy was performed on FTO glass ( $1 \times 2$  cm) by the same doctor blade method. The area of the electrode for the Mott-Schottky measurements was controlled to be 1 cm<sup>2</sup>. Mott-Schottky measurements were performed at a potential range from 1.6 V to -0.9 V versus NHE, with an A.C. voltage amplitude of 5 mV and

in a fixed frequency of 3 kHz or 5 kHz. Each increase of potential is 0.05 V. The quiet time for each test is 2 s. The flat-band potential  $E_{FB}$  of the catalyst is calculated by the potential  $E_{SCE}$  measured by the reference electrode and its standard electrode potential  $E_{SCE}^{\theta}$  according to Equation (1). For an n-type semiconductor, the conduction band bottom  $E_{CB}$  is 0.1-0.2V higher than  $E_{FB}$ , and then  $E_{CB}$  can be calculated according to Equation (2).

$$E_{FB} = E_{SCE} + E_{SCE}^{\theta} \text{ (vs. NHE)} \quad (1)$$

$$E_{CB} = E_{FB} - 0.10V \text{ (vs. NHE)} \quad (2)$$

## 1.2 Detailed process for electrochemical tests using RDE

Cyclic voltammetry (CV) and linear sweep voltammetry (LSV) are tested with a three electrodes pyrex glass system, in which potassium chloride (KCl) saturated Ag/AgCl, Pt wire, and catalysts coated glassy carbon (GC) electrodes are used as the reference, counter, and working electrode, respectively. Ar and O<sub>2</sub> saturated 0.1 M KOH solutions are taken as electrolytes independently. Cyclic voltammetry (CV) and linear sweep voltammetry (LSV) are conducted with the help of Metrohm multi-Autolab M204 (CHI 660E) potentiostat/galvanostat. GC rotating disk electrode (RDE) from Pine Instrument is used to assess the ORR kinetics. The RDE experiments are performed on a 5.0 mm diameter GC E5 disk. All the potential values from CVs and LSVs measurements in the alkaline electrolyte are converted to the reversible hydrogen electrode (RHE) via the following Equation (3).

$$E_{RHE} = E_{Ag/AgCl} + 0.0591pH + E_{Ag/AgCl}^0 = E_{Ag/AgCl} + 0.965 \quad (3)$$

Where  $E_{Ag/AgCl}^0 = 0.1976$  V (25 °C). The number of electrons ( $n$ ) associated with the ORR is evaluated from the Koutecky-Levich (K-L) analysis shown in Fig. 8a. K-L equation (4) is used to estimate the  $n$ .

$$\frac{1}{j} = \frac{1}{j_k} + \frac{1}{B\omega^{0.5}} \quad (4)$$

Here  $j$  and  $j_k$  are the total current density and kinetic current density, respectively, and  $\omega$  is the angular velocity in rotation per minute (rpm), and  $B$  is the Levich slope, which is estimated as follows equation (5).

$$B = 0.201nFC_{O_2}D_{O_2}^{2/3}\nu^{-1/6} \quad (5)$$

Where  $n$  represents the transferred electron number,  $F$  is the Faraday constant ( $F = 96485$  C mol<sup>-1</sup>),  $D_{O_2}$  is the diffusion coefficient of O<sub>2</sub> in 0.1 mol L<sup>-1</sup> KOH ( $1.9 \times 10^{-5}$  cm<sup>2</sup> s<sup>-1</sup>),  $\nu$  is the kinetic viscosity (0.01 cm<sup>2</sup> s<sup>-1</sup>), and  $C_{O_2}$  is the bulk concentration of O<sub>2</sub> ( $1.2 \times 10^{-7}$  mol·cm<sup>-3</sup>).

The voltammograms were measured in an O<sub>2</sub>-saturated aqueous 0.1 M KOH (25°C) at 5 mV·s<sup>-1</sup> with various rotating rates (400, 900, 1600, 2500 rpm). The working electrode is prepared as follows [S1]: 5 mg of the synthesized composite solid is added in 1 mL ethanol and ultrasonicated for 30 min. Afterward, 50 uL of Nafion solution (5 wt %) is mixed and sonicated for another 30 min. After that, 20 uL of the resultant solution is drop cast onto a glassy carbon (GC) electrode and thoroughly dried. The catalyst loading is 385 μg cm<sup>-2</sup>.

## 2 Detailed experimental process

### 2.1 Preparation of dihydropyridine ACMD and its structural characterization data

p-Hydroxybenzaldehyde, malononitrile, ammonium acetate, ethyl acetoacetate, triethylamine phosphate, and nano TiO<sub>2</sub> were all purchased from McLean and Aladdin Biochemical Technology Co., Ltd. these materials are analytical pure and used directly.

*Synthesis of intermediate 2-(4-hydroxy benzylidene)propionitrile.* In a flask, 2 g (16.38 mmol) of p-hydroxybenzaldehyde, 1.08 g (16.35 mmol) of propionitrile, and 15 mL of ethanol were added and stirred at room temperature for about 2 h to form yellow solid precipitation. Then the solid was filtered, rinsed with deionized waters (2×10 mL), and then dried at 60°C to obtain 2.61g (15.35 mmol) the targeted intermediate, yellow solid, yield 95%, M.P. 186 °C. FT-IR (cm<sup>-1</sup>, KBr) :3350.99, 2351.97, 2227.66, 1571.59, 1295.27, 1170.62, 833.61, 635.02.

*Synthesis of ACMD.* Because of the low efficiency of literature methods, we adopted a new catalytic synthesis to obtain ACMD [S2-S4]. In a flask, 0.5 g (2.94 mmol) 2-(4-hydroxy benzylidene)malononitrile, 0.32 g (7.14 mmol) ammonium acetate, 0.55 g (4.23 mmol) ethyl acetoacetate, and 0.1 g (0.5 mmol) catalyst triethylamine phosphate were mixed and added to 5 mL ethanol, then the solution was maintained at about 30 °C with stirring to react for about 4 h. After the completion of cyclo-condensation reaction (monitored by TLC), 2 mL water was added to promote

the precipitation of product, and then crude ACMD was obtained through vacuum filtration and drying at 60°C for 8 h. After recrystallization with ethanol, the earthy yellow ACMD was obtained in 60% yield, M.P. 143 °C. FT-IR (cm<sup>-1</sup>, KBr) :3390.54, 3327.66, 3207.49, 2983.70, 2934.56, 2198.38, 1701.48, 1222.37. <sup>1</sup>H NMR (400 MHz, DMSO-d<sub>6</sub>, Fig.S1) δ (ppm): 9.32 (s, 1H, -NH),9.31 (s, 1H, Ar-OH), 6.95 – 6.80 (m, 4H, Ar-H), 6.70 – 6.63 (m, 2H, -NH<sub>2</sub>), 4.16 (d, J = 0.6 Hz, 1H, -CH), 4.06 – 3.87 (m, 2H, -CH<sub>2</sub>-O), 2.26 (d, J = 0.6 Hz, 3H, Me), 1.04 (t, J = 7.1 Hz, 3H, Ar-CH<sub>3</sub>).

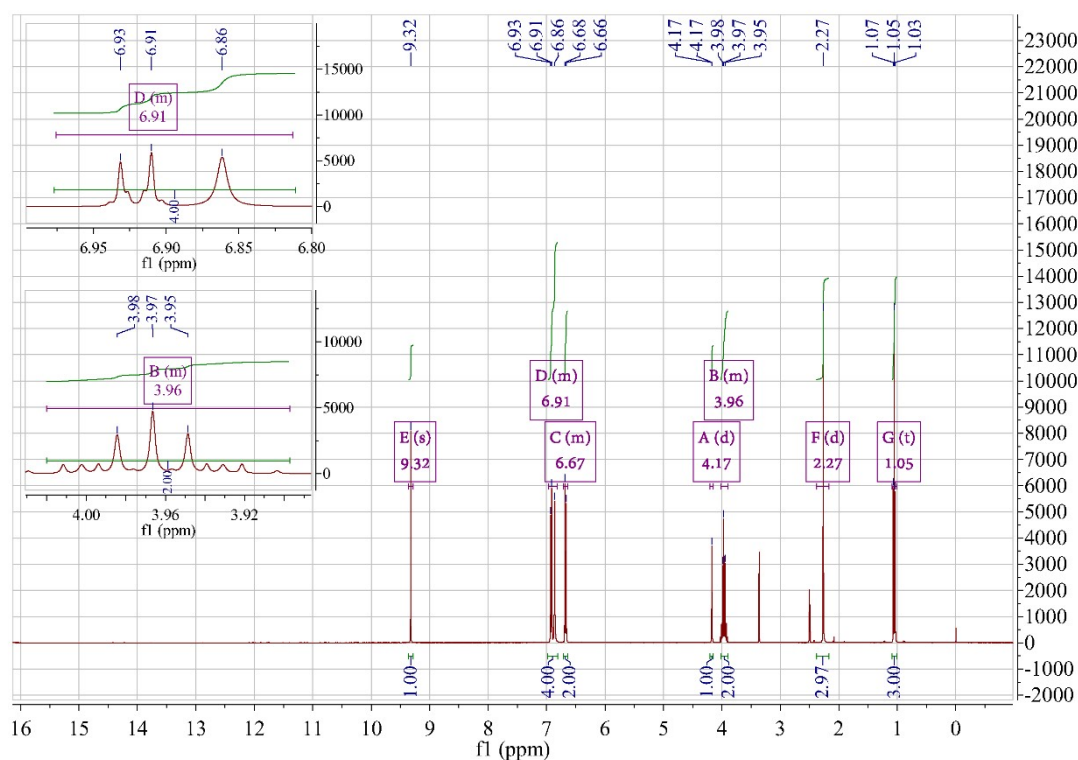

Fig.S1 <sup>1</sup>H NMR of ACMD

## 2.2 Determination of quantum efficiency and solar energy efficiency

### 2.2.1 Apparent quantum efficiency analysis

The measurement of apparent quantum efficiency (AQE) was carried out in a

quartz reactor. As a typical run, 10 mL of pure water, 10 mg of catalysts, and 500  $\mu$ L Benzyl alcohol were added into the reactor. After 10 min of ultra-sonication and O<sub>2</sub> bubbling, it was irradiated by a Xenon lamp (GX2300, equipped with light filters 365 $\pm$ 5 nm and 435 $\pm$ 10 nm) for 6 h. The average intensities of irradiation to the reactor were determined by a spectroradiometer (PL-MW2000). The AQE was calculated using the following equation:

$$AQY = \frac{N_e}{G_p} \times 100\%$$

Where the reaction electrons amount,  $N_e$  was determined by the following equation:

$$N_e = 2 \times n \times N_A$$

The incident photon quantity ( $G_p$ ) was determined by the following equation:

$$G_p = \frac{1}{hc} \int_{\lambda_1}^{\lambda_2} G_e(\lambda) \lambda d\lambda$$

Where the functional relation of energetic quantity  $G_e(\lambda)$  and wavelength  $\lambda$  was determined by the numerical simulation of the energy distribution of xenon lamp in the transmission band. Then AQE was obtained under the known data, including the amount of H<sub>2</sub>O<sub>2</sub> molecules ( $n$ ), the Avogadro constant ( $N_A$ ), the speed of light ( $c$ ), and the Planck constant ( $h$ ).

### 2.2.2 Determination of solar-to-chemical conversion efficiency.

Solar-to-chemical conversion efficiency (SCC) was determined by a 300 W xenon solar simulator, and a light-blocking plate with a hole of 2cm diameter is placed in the front to control the light-receiving area of the reaction solution. The



photoreaction was performed in pH = 2 solution (100 mL) with photocatalyst (50 mg) under O<sub>2</sub> bubbling in a jacketed beaker equipped with a light filter. Before the photo reaction, the solution was stirred in dark for 1h to balance the adsorption, and after light radiation started, 1 mL sample solution was taken out every 2h to determine H<sub>2</sub>O<sub>2</sub> concentration. Then, the SCC of the catalyst was calculated by the following equation:

$$SCC(\%) = \frac{\Delta G \cdot n}{E \cdot t} \times 100\%$$

where  $\Delta G$  is the free energy for H<sub>2</sub>O<sub>2</sub> generation (117 kJ mol<sup>-1</sup>),  $n$  is the amount of H<sub>2</sub>O<sub>2</sub> formed (mol),  $t$  is the irradiation time (s), and  $E$  is the total input power (W). The overall irradiation intensity of the AM1.5 global spectrum (300-2,500 nm) is 1,000 W m<sup>-2</sup>, and the irradiation area is  $3.14 \times 10^{-4}$  m<sup>2</sup>, the total input power over the irradiation area is thus determined to be 0.314 W.

### 2.3 H<sub>2</sub>O<sub>2</sub> degradation study

To determine the properties of catalyst-induced photodecomposition of H<sub>2</sub>O<sub>2</sub>, 10 mg of the photocatalyst was added into 10 mL of 27.6 mM H<sub>2</sub>O<sub>2</sub> aqueous solution containing 500 μL benzyl alcohol and 1 mmol Na<sub>2</sub>SiO<sub>3</sub>. After ultrasonic dispersion for 5 min, it was kept in dark for 30 min to make it reach adsorption equilibrium. Then, photosynthesis was conducted with the irradiation of a xenon lamp (300 W, > 300 nm), and the samples were taken out every 1h. TiO<sub>2</sub> as a reference is determined according to the same process.

## 2.4 Effect of benzyl alcohol on the reaction

In the reaction tube, 10 mg catalyst, 10 mL H<sub>2</sub>O, and 500  $\mu$ L benzyl alcohol were added and ultrasonically dispersed for 5 min and maintained in dark for 30 min with stirring, and then the photocatalytic reaction was carried out under the bubbling of O<sub>2</sub> and N<sub>2</sub> respectively. Samples were taken every 2 h to analyze the concentration of H<sub>2</sub>O<sub>2</sub>. Under the same conditions, the comparative experiments were conducted without adding benzyl alcohol, to test the concentration of H<sub>2</sub>O<sub>2</sub> obtained by bubbling O<sub>2</sub> and N<sub>2</sub> respectively. The results are illustrated in **Fig.S4**.

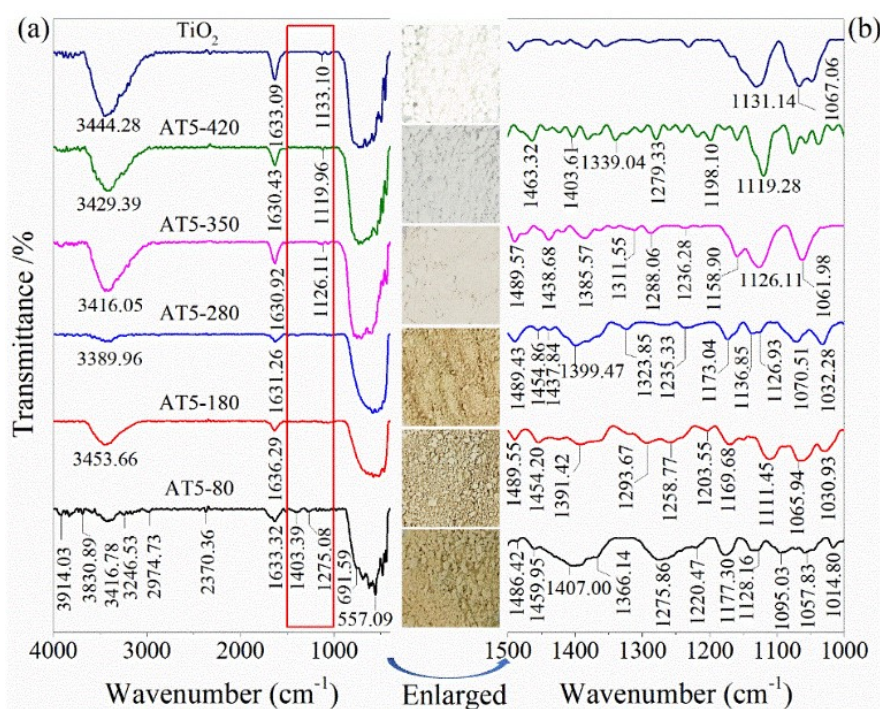

**Fig.S2** FT-IR spectra of the catalyst ACMD-TiO<sub>2</sub> calcined at different temperatures (a) and their enlarged view of the part between 1000-1500cm<sup>-1</sup> (b). The inserted pictures between them are the appearance of the corresponding catalyst.

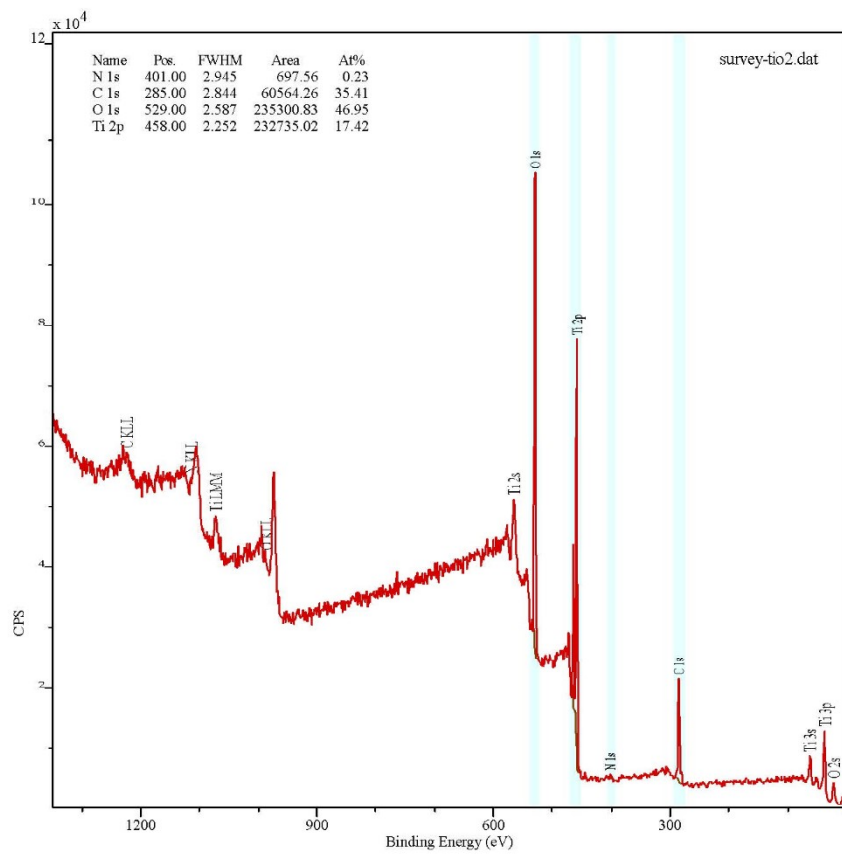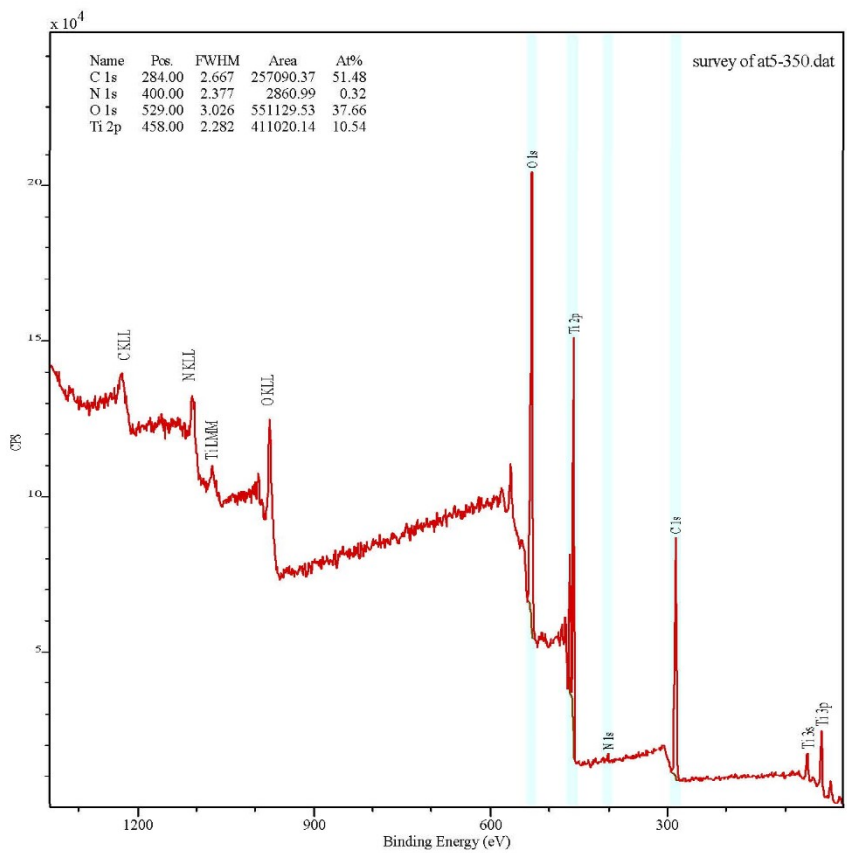

**Fig.S3** Elements content of TiO<sub>2</sub> and AT5-350

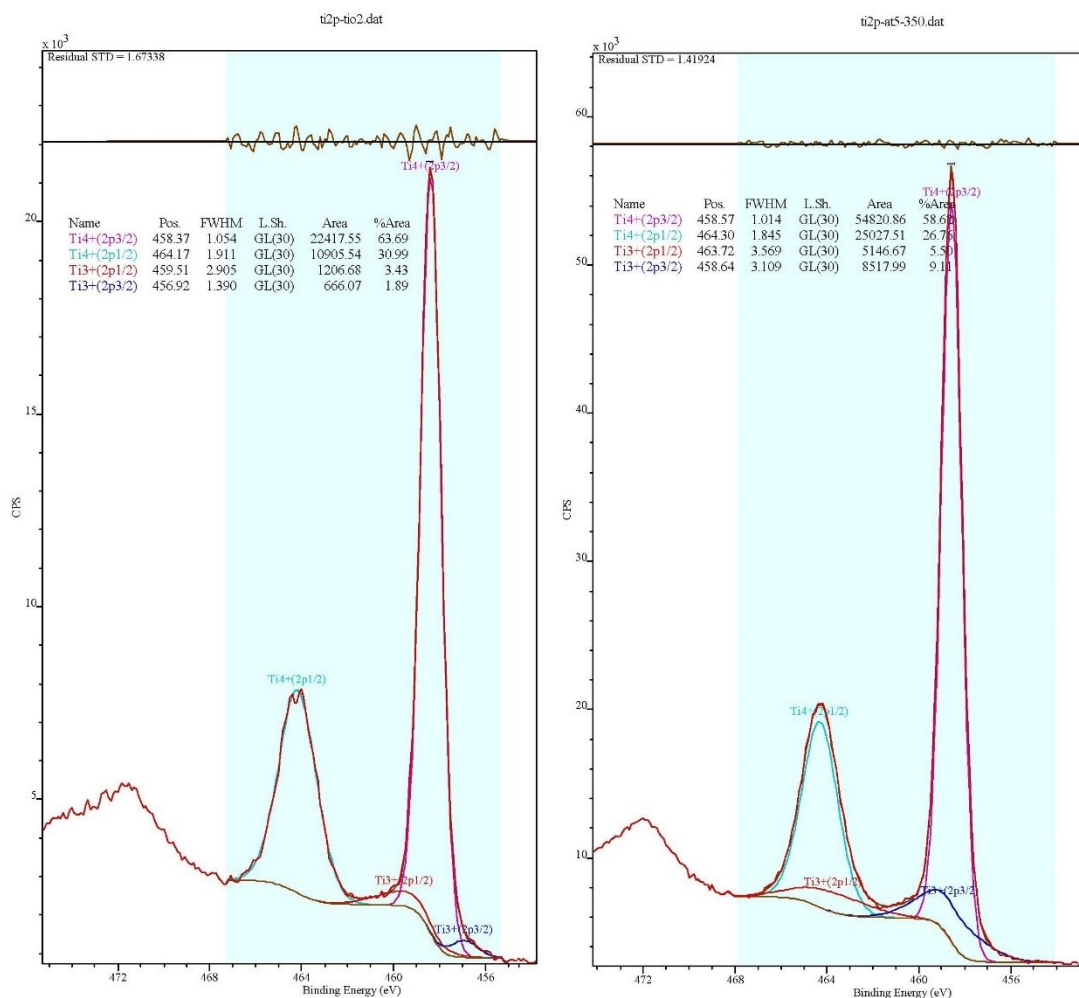

**Fig.S4** High-resolution XPS spectra of Ti2p for TiO<sub>2</sub> (left) and AT5-350 (right)

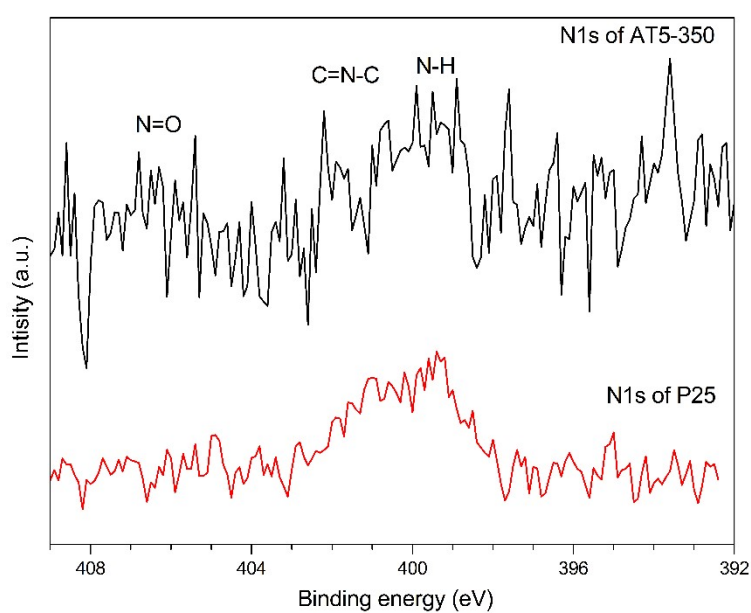

**Fig.S5** High-resolution XPS spectra of N1s for TiO<sub>2</sub> and AT5-350

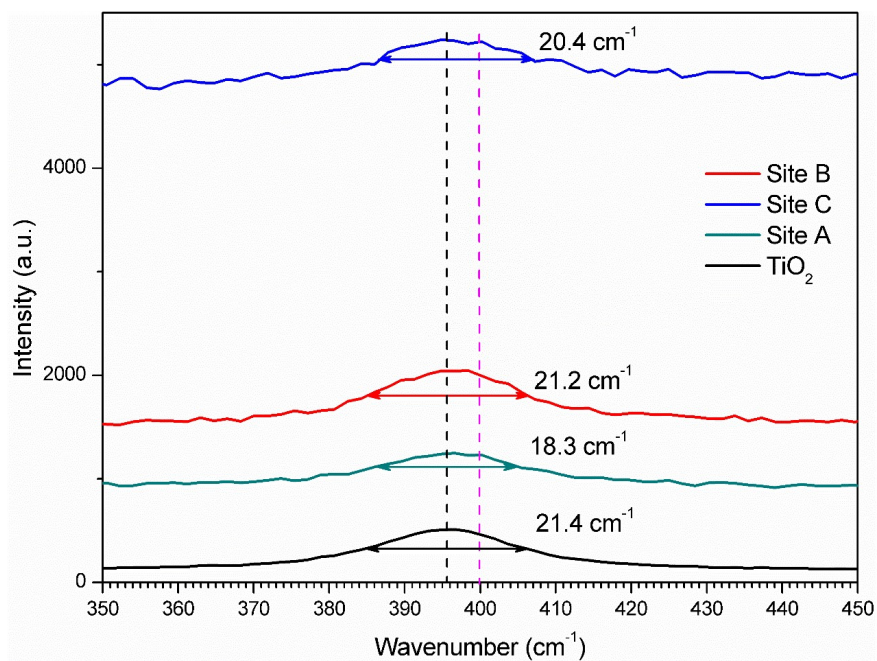

**Fig.S6** Raman mode of  $B_{1g}(1)$  for  $\text{TiO}_2$  and different sites of ACMD- $\text{TiO}_2$  marked with FWHM.

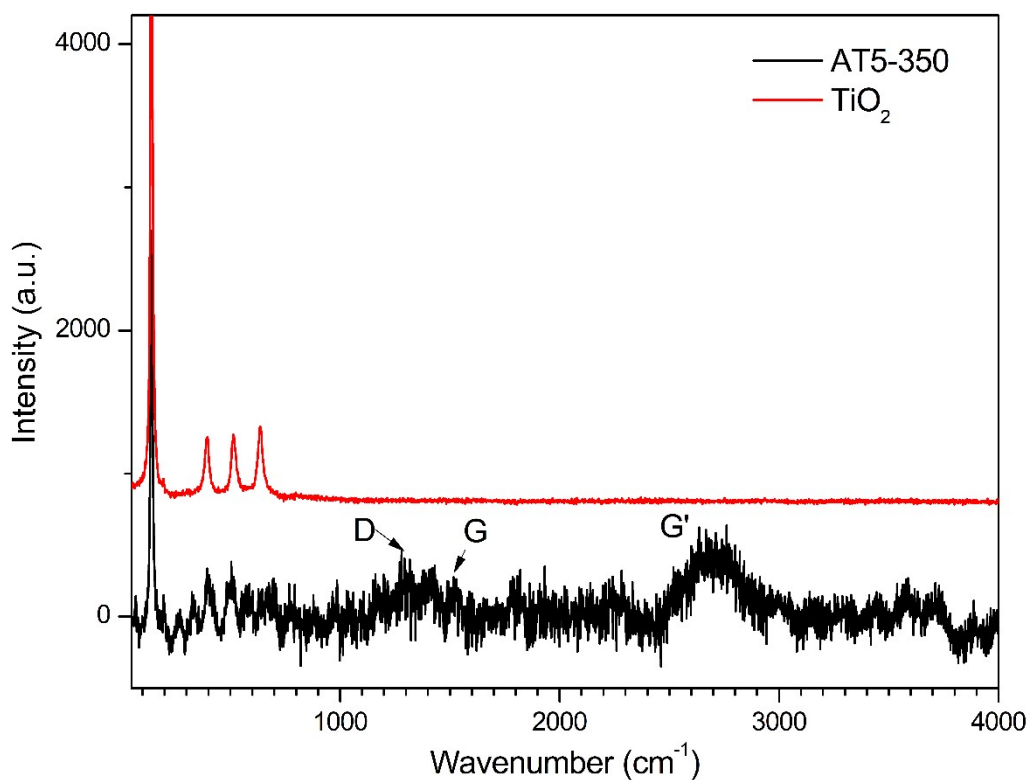

**Fig.S7** Raman spectra of  $\text{TiO}_2$  and AT5-350 under 785 nm laser

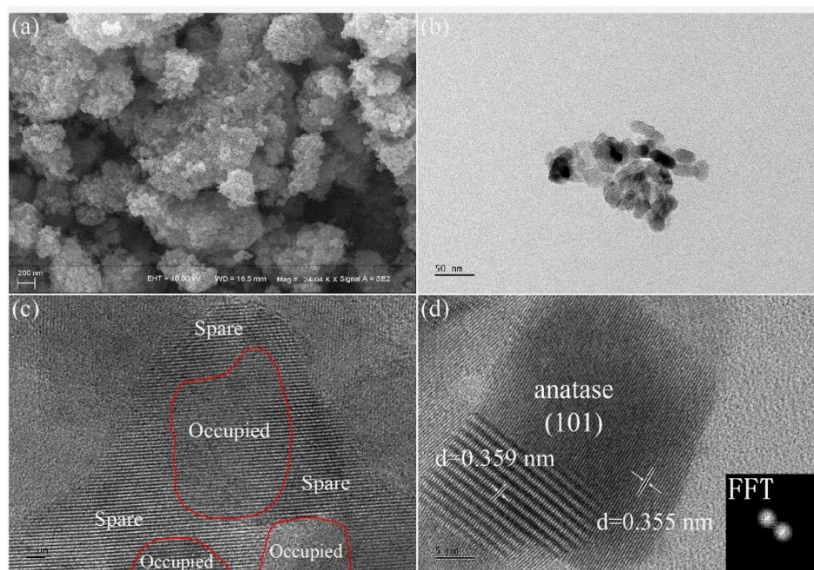

**Fig.S8.** Surface features of ACMD-TiO<sub>2</sub>. (a) HRSEM, (b) and (c) HRTEM features. (d) diffraction and FFT of the HRTEM feature (The inserted is the FFT photo).

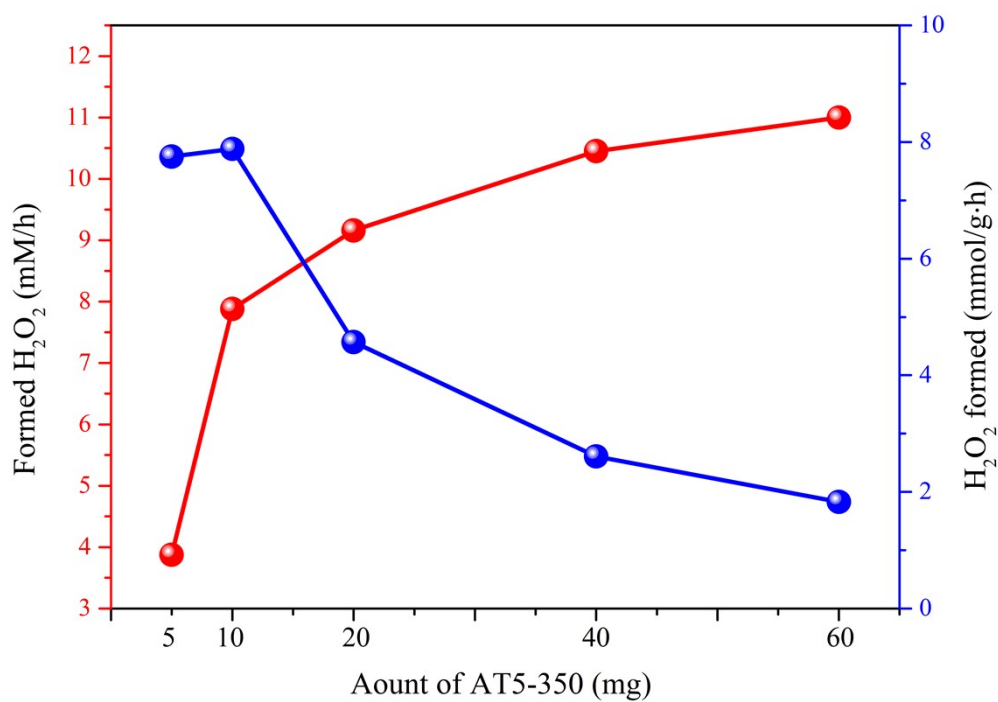

**Fig.S9** The influence of AT5-350 amount on H<sub>2</sub>O<sub>2</sub> production.

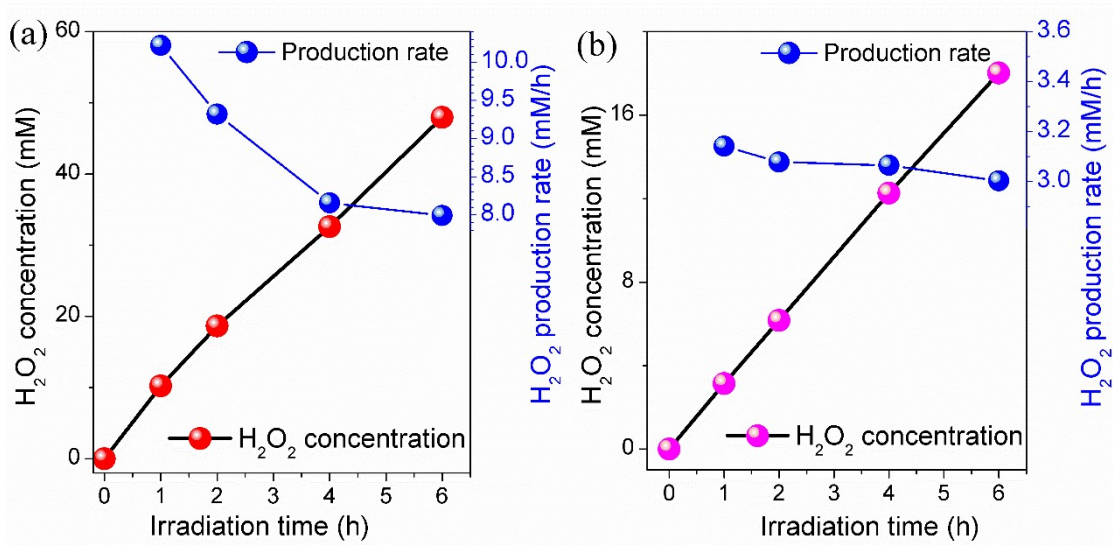

**Fig.S10** Comparison of H<sub>2</sub>O<sub>2</sub> production under different irradiation of xenon light (a) above 300 nm and (b) above 420 nm.

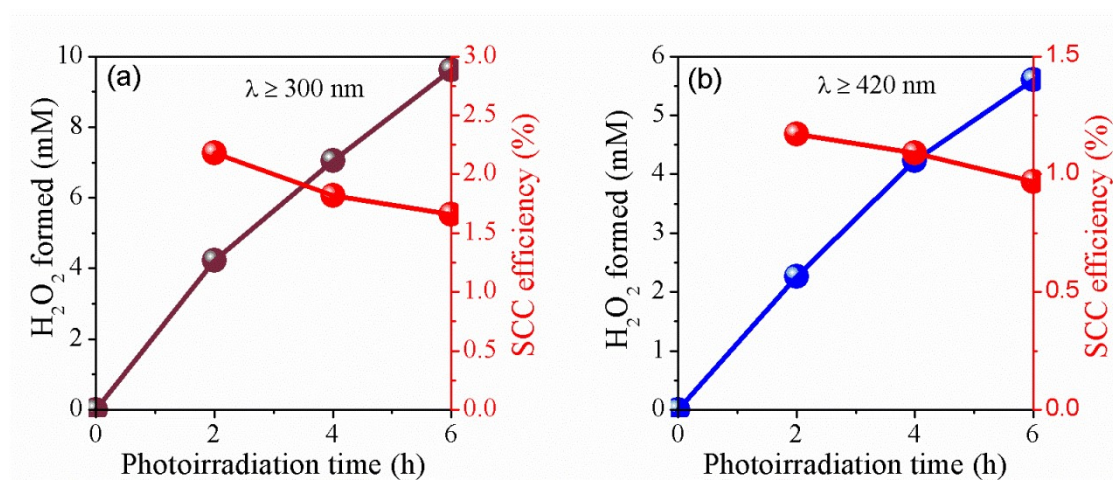

**Fig.S11** SCC efficiency of catalyst AT5-350 under visible light irradiation. (Conditions: 10 mg catalyst and 500 μL benzyl alcohol were used in 10 mL water, pH = 2, Xenon lamp 300W, > 420 nm)

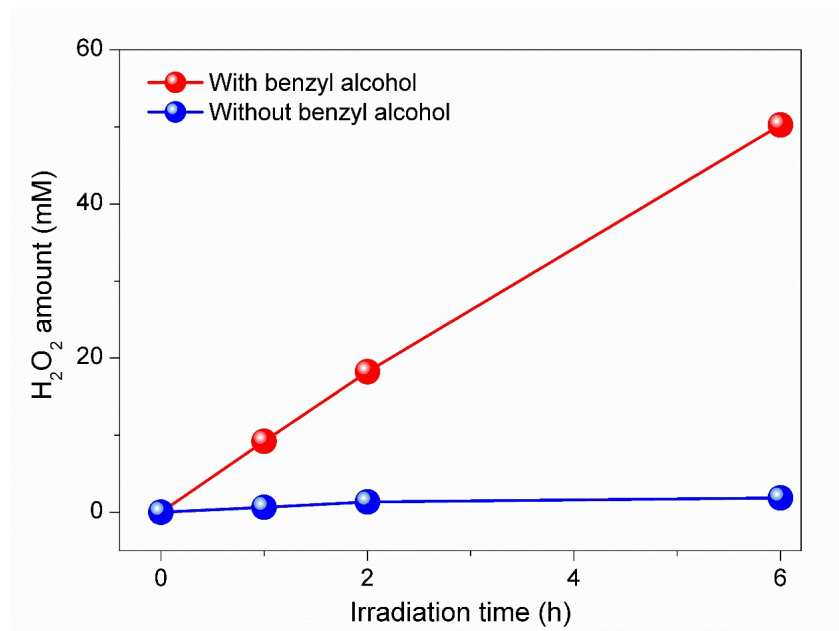

**Fig.S12** H<sub>2</sub>O<sub>2</sub> formed by bubbling O<sub>2</sub> and N<sub>2</sub> with or without benzyl alcohol

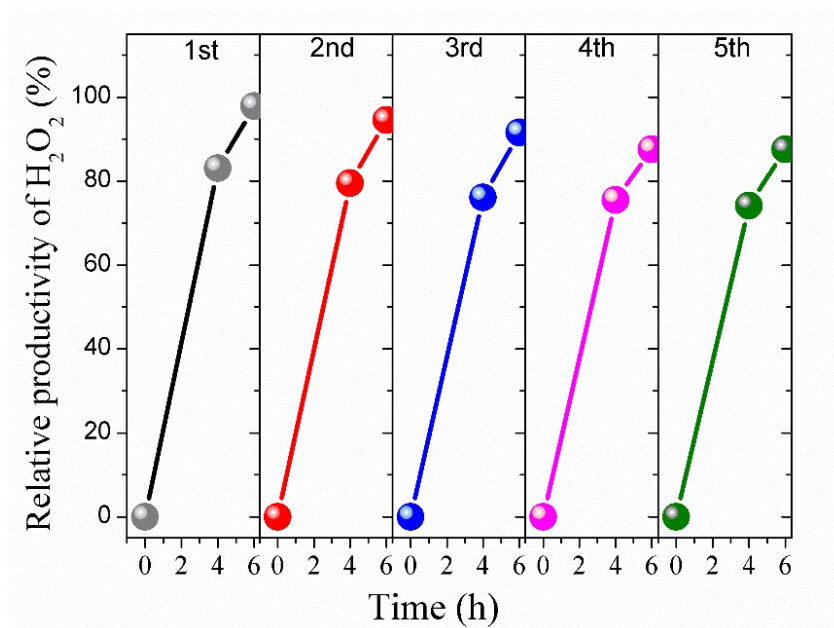

**Fig.S13** Relative productivity of H<sub>2</sub>O<sub>2</sub> in each reuse run (Conditions: 10 mg catalyst and 500  $\mu$ L benzyl alcohol were used in 10 mL water, pH = 2, Xenon lamp 300W, > 300 nm).



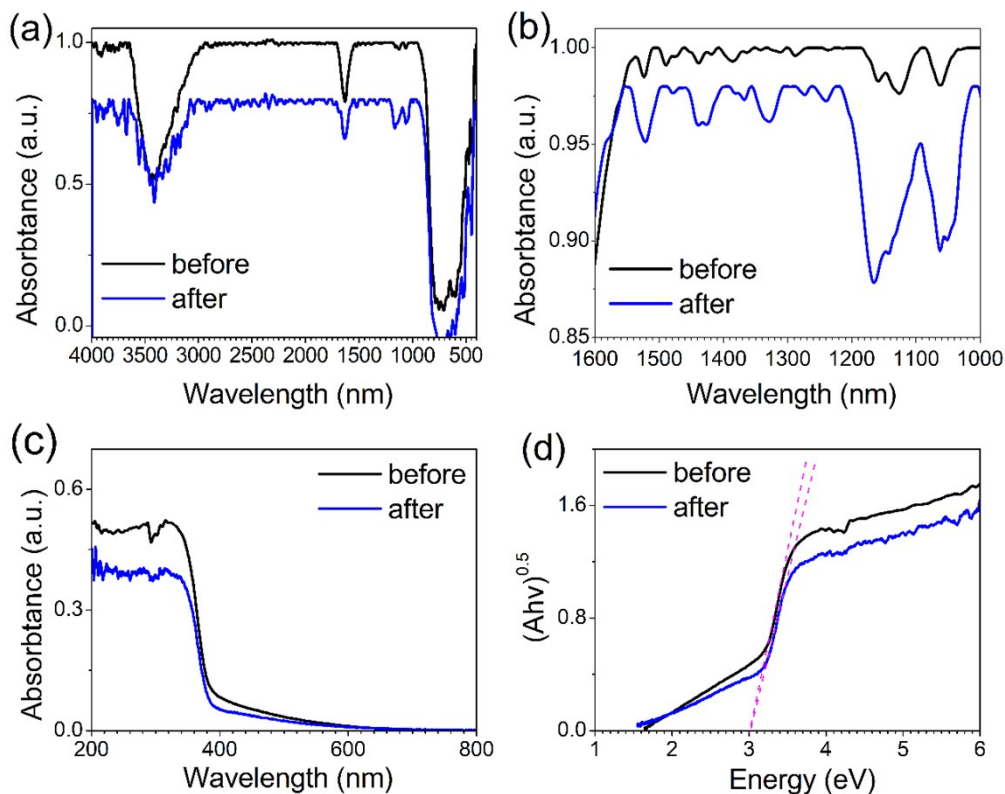

**Fig.S14** Structural comparison of catalyst AT5-350 before and after reuse 5 times. (a) Full FTIR spectra, (b) Enlarged FTIR view of 1600-1000cm<sup>-1</sup>, (c) UV-vis DRS, and (d) Tauc plots.

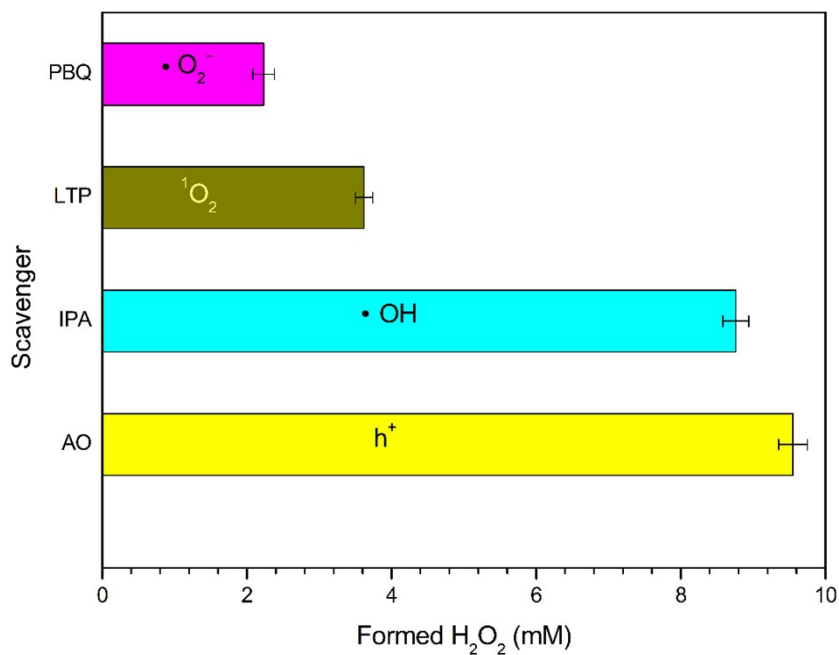

**Fig.S15** Scavenger test results of catalyst AT5-350. Conditions: 10 mg catalyst and 500  $\mu$ L benzyl alcohol were used in 10 mL water with pH = 2, and 0.01M scavenger was used in 10 mL reactant, irradiating with 300W Xenon lamp (> 300 nm) for 2 h.

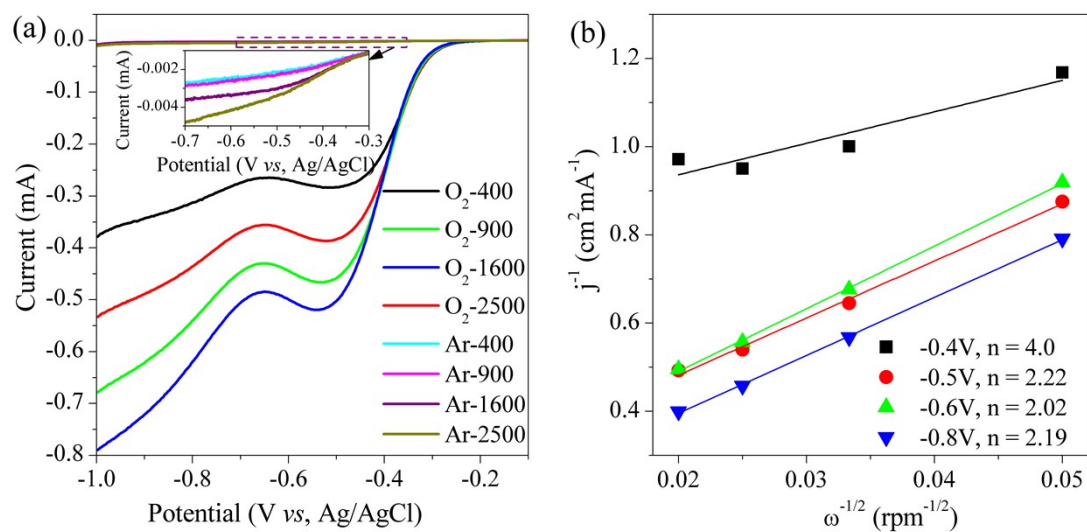

**Fig.S16** (a) Linear-sweep voltammograms of the catalyst AT5-350 and (b) The Koutecky–Levich plots at different potentials

**Table S1** Graphitization reaction conditions of ACMD-TiO<sub>2</sub>

| Entry       | ACMD amount<br>(g/2g TiO <sub>2</sub> )* | Temperature<br>(°C) | Time<br>(h) | Ventilation<br>types | C(H <sub>2</sub> O <sub>2</sub> )<br>(mM)** |
|-------------|------------------------------------------|---------------------|-------------|----------------------|---------------------------------------------|
| 1           | 0.05                                     | 180                 | 2           | O <sub>2</sub>       | 15.12                                       |
| 2           | 0.05                                     | 280                 | 3.5         | /                    | 28.19                                       |
| 3           | 0.05                                     | 380                 | 5           | Air                  | 34.73                                       |
| 4           | 0.1                                      | 180                 | 3.5         | Air                  | 19.22                                       |
| 5           | 0.1                                      | 280                 | 5           | O <sub>2</sub>       | 22.04                                       |
| 6           | 0.1                                      | 380                 | 2           | /                    | 30.75                                       |
| 7           | 0.2                                      | 180                 | 5           | /                    | 6.92                                        |
| 8           | 0.2                                      | 280                 | 2           | Air                  | 9.23                                        |
| 9           | 0.2                                      | 380                 | 3.5         | O <sub>2</sub>       | 29.21                                       |
| Mean value1 | 26.013                                   | 13.753              | 18.367      | 22.123               | -                                           |
| Mean value2 | 24.003                                   | 19.820              | 25.540      | 21.953               | -                                           |
| Mean value3 | 15.120                                   | 31.563              | 21.230      | 21.060               | -                                           |
| Range       | 10.893                                   | 17.810              | 7.173       | 1.063                | -                                           |

\* The dosage of TiO<sub>2</sub> is set as 2 g for each proportioning case.

\*\*Using 10 mg catalyst in 10 mL water with 500  $\mu$ L benzyl alcohol, air bubbling to provide oxygen, and irradiated with 300 W xenon lamp for 6 h.

**Table S2** The results of further optimization for the conditions of ACMD-TiO<sub>2</sub>

| Entry | ACMD amount<br>(g)* | Temperatur<br>e<br>(°C) | C(H <sub>2</sub> O <sub>2</sub> )<br>(mM)** |
|-------|---------------------|-------------------------|---------------------------------------------|
| 1     | 0.05                | 320                     | 20.66                                       |
| 2     | 0.05                | 350                     | 37.26                                       |
| 3     | 0.05                | 380                     | 30.81                                       |
| 4     | 0.05                | 420                     | 33.57                                       |
| 5     | 0.1                 | 320                     | 28.34                                       |
| 6     | <u>0.1</u>          | <u>350</u>              | <u>40.00</u>                                |
| 7     | 0.1                 | 380                     | 35.11                                       |
| 8     | 0.1                 | 420                     | 24.86                                       |

\* The dosage of TiO<sub>2</sub> is set as 2 g for each proportioning case.

\*\*Using 10 mg catalyst in 10 mL water with 500  $\mu$ L benzyl alcohol, air bubbling to provide oxygen, and irradiated with 300 W xenon lamp for 6 h.

**Table S3** Comparison of H<sub>2</sub>O<sub>2</sub> production.

| Photocatalyst                          | Electron donor                   | Wavelength<br>/nm | H <sub>2</sub> O <sub>2</sub><br>/mmol/(h·g) | $\phi_{AQY}$<br>/%                       | Ref.  |
|----------------------------------------|----------------------------------|-------------------|----------------------------------------------|------------------------------------------|-------|
| Au-Ag/TiO <sub>2</sub>                 | Ethanol                          | >280              | 0.15                                         | —                                        | [S5]  |
| TiO <sub>2</sub>                       | Benzyl alcohol                   | >280              | 0.33                                         | <a href="#">29.1@334</a> nm <sup>a</sup> | [S6]  |
| Au/TiO <sub>2</sub>                    | HCOOH                            | >420              | 0.64-0.70                                    | <a href="#">13.7@450</a> nm              | [S7]  |
| Si/TiO <sub>2</sub> -Au(electrode)     | /                                | 365               | 5.7uM/h <sup>b</sup>                         | —                                        | [S8]  |
| CoPi/rGO/TiO <sub>2</sub>              | 2-propanol                       | $\geq$ 320        | 3                                            | —                                        | [S9]  |
| TiO <sub>2</sub> /rGO/Carbon dots      | 2-propanol                       | AM1.5             | 0.35                                         | —                                        | [S10] |
| TiO <sub>2</sub> /WO <sub>3</sub> /rGO | 2-propanol                       | AM1.5             | 0.27                                         | —                                        | [S11] |
| Au/TiO <sub>2</sub>                    | C <sub>2</sub> H <sub>5</sub> OH | >320              | 0.625                                        | —                                        | [S12] |
| SN-GQD/TiO <sub>2</sub>                | 2-propanol                       | >420              | 0.902                                        | —                                        | [S13] |
| TiO <sub>2</sub>                       | 2-propanol                       | =365              | 0.2116                                       | <a href="#">19.8@365</a> nm              | [S14] |
| Au/TiO <sub>2</sub>                    | CH <sub>3</sub> OH               | >320              | 0.35                                         | —                                        | [S15] |
| Co@TiO <sub>2</sub>                    | CH <sub>3</sub> OH               | =400              | 1.7                                          | —                                        | [S16] |

|                                                     |                |          |                      |                                          |              |
|-----------------------------------------------------|----------------|----------|----------------------|------------------------------------------|--------------|
| HTNT-CD                                             | Ethanol        | >420     | 3.42                 | <a href="#">5.2@365</a> nm               | [S17]        |
| SNG/TiO <sub>2</sub>                                | 2-propanol     | ≥300     | 0.0746               | —                                        | [S18]        |
| Au/SnO <sub>2</sub> -TiO <sub>2</sub>               | Alcohol        | UV       | 0.6                  | —                                        | [S19]        |
| Pt-TiO <sub>2</sub>                                 | /              | Full     | 5.096                | —                                        | [S20]        |
| Carbon/Au-TiO <sub>2</sub>                          | EtOH           | =367     | 3.69                 | <a href="#">17.29@367</a> nm             | [S21]        |
| Au/[SnO <sub>2</sub> -NR#TiO <sub>2</sub> ]         | EtOH           | 420-485  | 0.01                 | —                                        | [S22]        |
| Au/Bi <sub>2</sub> O <sub>3</sub> -TiO <sub>2</sub> | EtOH           | >420     | 0.93                 | —                                        | [S23]        |
| RuO <sub>2</sub> #TiO <sub>2</sub> -Au              | /              | >300     | 0.08                 | —                                        | [S24]        |
| TNS                                                 | ethanol        | >300     | 1.746                | 5.96@365 nm <sup>a</sup>                 | [S25]        |
| TiO <sub>2</sub> /Pt/Co POM                         | methanol       | =365     | 1.395                | <a href="#">1.09@365</a> nm <sup>a</sup> | [S26]        |
| Cu <sup>2+</sup> /TiO <sub>2</sub>                  | /              | =300-400 | 9.6×10 <sup>-4</sup> | —                                        | [S27]        |
| F-TiO <sub>2</sub>                                  | HCOOH          | =360     | 0.96-1.25            | —                                        | [S28]        |
| Zn <sup>2+</sup> /TiO <sub>2</sub>                  | /              | 125W Hg  | 0.15                 | —                                        | [S29]        |
| Au/TiO <sub>2</sub>                                 | Ethanol        | >300     | 0.25                 | 13@355±23<br>nm <sup>a</sup>             | [S30]        |
| ACMD- TiO <sub>2</sub>                              | Benzyl alcohol | >300     | 10.22                | 24.5@365nm <sup>a</sup>                  | This<br>work |

<sup>a</sup> AQE

<sup>b</sup> Weight of electrode made of catalyst not provided.

### 3. Statement about Tauc efficiency

It should be noted that there are many factors affecting the modes of electronic transition energy (direct and indirect), such as band alignments and surface electronic states of each TiO<sub>2</sub> phase, which all are based on the preparation and the formation of TiO<sub>2</sub>. For this reason, for this report, the *E<sub>g</sub>* of all as-modified TiO<sub>2</sub> was mainly related to the indirect transition and thus Tauc efficiency 2 was used to determine it.

## References

- [S1] D. Mahato, Y. P. Kharwar, K. Ramanujam, P. Haridoss, T. Thomas, *Int. J. Hydrogen Energy* **2021**, *46*, 21549–21565. <https://doi.org/10.1016/j.ijhydene.2021.04.013>.
- [S2] J. Marco-Contelles, R. León, C. De Los Ríos, A. Samadi, M. Bartolini, V. Andrisano, O. Huertas, X. Barril, F. J. Luque, M. I. Rodríguez-Franco, B. López, M. G. López, A. G. García, M. D. C. Carreiras, M. Villarroja, *J. Med. Chem.* **2009**, *52*, 2724–2732. <https://doi.org/10.1021/jm801292b>.
- [S3] S. Khot, P. B. Auti, S. A. Khedkar, *Mini-Reviews Med. Chem.* **2020**, *21*, 135–149. <https://doi.org/10.2174/1389557520666200807130215>.
- [S4] J. Safaei-Ghomi, A. Ziarati, R. Teymuri, *Bull. Korean Chem. Soc.* **2012**, *33*, 2679–2682. <https://doi.org/10.5012/bkcs.2012.33.8.2679>.
- [S5] D. Tsukamoto, A. Shiro, Y. Shiraishi, Y. Sugano, S. Ichikawa, S. Tanaka and T. Hirai, *ACS Catal.*, 2012, **2**, 599–603. doi: 10.1021/cs2006873.
- [S6] Y. Shiraishi, S. Kanazawa, D. Tsukamoto, A. Shiro, Y. Sugano, T. Hirai, *ACS Catal.* **2013**, *3*, 2222–2227. <https://doi.org/10.1021/cs400511q.Y>
- [S7] Y. Shiraishi, S. Kanazawa, Y. Kofuji, H. Sakamoto, S. Ichikawa, S. Tanaka and T. Hirai, *Angew. Chemie*, 2014, **126**, 13672–13677. doi: 10.1002/ange.201407938.
- [S8] N. Kaynan, B. A. Berke, O. Hazut and R. Yerushalmi, *J. Mater. Chem. A*, 2014, **2**, 13822–13826. doi: 10.1039/c4ta03004d.
- [S9] G. H. Moon, W. Kim, A. D. Bokare, N. E. Sung and W. Choi, *Energy Environ. Sci.*, 2014, **7**, 4023–4028. doi: 10.1039/c4ee02757d.

- [S10] X. Zeng, Z. Wang, N. Meng, D. T. McCarthy, A. Deletic, J. hong Pan and X. Zhang, *Appl. Catal. B Environ.*, 2017, **202**, 33–41. doi: 10.1016/j.apcatb.2016.09.014.
- [S11] X. Zeng, Z. Wang, G. Wang, T. R. Gengenbach, D. T. McCarthy, A. Deletic, J. Yu and X. Zhang, *Appl. Catal. B Environ.*, 2017, **218**, 163–173. doi: 10.1016/j.apcatb.2017.06.055.
- [S12] M. Teranishi, S. I. Naya and H. Tada, *J. Phys. Chem. C*, 2016, **120**, 1083–1088. doi: 10.1021/acs.jpcc.5b10626.
- [S13] L. Zheng, H. Su, J. Zhang, L. S. Walekar, H. Vafaei Molamahmood, B. Zhou, M. Long and Y. H. Hu, *Appl. Catal. B Environ.*, 2018, **239**, 475–484. doi: 10.1016/j.apcatb.2018.08.031.
- [S14] B. O. Burek, D. W. Bahnemann and J. Z. Bloh, *ACS Catal.*, 2019, **9**, 25–37. doi: 10.1021/acscatal.8b03638.
- [S15] X. Xiong, X. Zhang, S. Liu, J. Zhao and Y. Xu, *Photochem. Photobiol. Sci.*, 2018, **17**, 1018–1022. doi: 10.1039/c8pp00177d.
- [S16] T. Baran, S. Wojtyła, A. Minguzzi, S. Rondinini and A. Vertova, *Appl. Catal. B Environ.*, 2019, **244**, 303–312. doi: 10.1016/j.apcatb.2018.11.044.
- [S17] R. Ma, L. Wang, H. Wang, Z. Liu, M. Xing, L. Zhu, X. Meng and F. S. Xiao, *Appl. Catal. B Environ.*, 2019, **244**, 594–603. doi: 10.1016/j.apcatb.2018.11.087.
- [S18] L. Zheng, J. Zhang, Y. H. Hu and M. Long, *J. Phys. Chem. C*, 2019, **123**, 13693–13701. doi: 10.1021/acs.jpcc.9b02311.
- [S19] G. Zuo, B. Li, Z. Guo, L. Wang, F. Yang, W. Hou, S. Zhang, P. Zong, S. Liu, X. Meng, Y. Du, T. Wang and V. A. L. Roy, *Catalysts*, 2019, **9**, 623. DOI:10.3390/catal9070623.
- [S20] L. Wang, S. Cao, K. Guo, Z. Wu, Z. Ma and L. Piao, *Chinese J. Catal.*, 2019, **40**, 470–475. doi: 10.1016/s1872-2067(19)63274-2.

- [S21] Z. Liu, X. Sheng, D. Wang and X. Feng, *iScience*, 2019, **17**, 67–73. doi: 10.1016/j.isci.2019.06.023.
- [S22] K. Awa, S. I. Naya, M. Fujishima and H. Tada, *J. Phys. Chem. C*, 2020, **124**, 7797–7802. doi: 10.1021/acs.jpcc.9b11875.
- [S23] L. Feng, B. Li, Y. Xiao, L. Li, Y. Zhang, Q. Zhao, G. Zuo, X. Meng and V. A. L. Roy, *Catal. Commun.*, 2021, **155**, 0–3, DOI:10.1016/j.catcom.2021.106315.
- [S24] M. Nagamitsu, K. Awa and H. Tada, *Chem. Commun.*, 2020, **56**, 8190–8193. doi: 10.1039/d0cc03327h.
- [S25] Y. Yang, B. Zhu, L. Wang, B. Cheng, L. Zhang and J. Yu, *Appl. Catal. B Environ.*, 2022, **317**, 121788. DOI:10.1016/j.apcatb.2022.121788.
- [S26] B. He, C. Luo, Z. Wang, L. Zhang and J. Yu, *Appl. Catal. B Environ.*, 2023, **323**, 122200. DOI:10.1016/j.apcatb.2022.122200.
- [S27] R. Cai, Y. Kubota and A. Fujishima, *J. Catal.*, 2003, **219**, 214–218. doi: 10.1016/S0021-9517(03)00197-0.
- [S28] V. Maurino, C. Minero, G. Mariella and E. Pelizzetti, *Chem. Commun.*, 2005, 2627–2629. doi: 10.1039/b418789j.
- [S29] V. Maurino, C. Minero, E. Pelizzetti, G. Mariella, A. Arbezano and F. Rubertelli, *Res. Chem. Intermed.*, 2007, **33**, 319–332. doi: 10.1163/156856707779238711.
- [S30] M. Teranishi, S. I. Naya and H. Tada, *J. Am. Chem. Soc.*, 2010, **132**, 7850–7851. doi: 10.1021/ja102651g.
